# Supplementary material for: Instantaneous sea ice drift speed from TanDEM-X interferometry
Source: Copernicus journal article supplement (doi:10.5194/tc-13-1395-2019), 2019-04-29
Supplement: Supplementary file 1 [file Validation_data.docx]

Validation data from ground-based radar in Utqiaġvik, Alaska as described in the manuscript is included in the file: flow_20151120_10_20_1_10_phys_filt_med.mat

The coordinates of the individual grid points are included in the file: vgridpoints.csv
