# Supplementary material for: Instantaneous sea ice drift speed from TanDEM-X interferometry
Source: Copernicus journal article supplement (doi:10.5194/tc-13-1395-2019), 2019-04-29
Supplement: Supplementary file [file tc-13-1395-2019-supplement-title-page.pdf › tc-13-1395-2019-supplement-title-page.pdf]

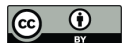

## *Supplement of*

# **Instantaneous sea ice drift speed from TanDEM-X interferometry**

**Dyre Oliver Dammann et al.**

*Correspondence to:* Dyre Oliver Dammann ([dyre.dammann@stormgeo.com](mailto:dyre.dammann@stormgeo.com))

- [tc-13-1395-2019-supplement-title-page.pdf](#)
- [Validation\\_data.docx](#)
- [flow\\_20151120\\_10\\_20\\_1\\_10\\_phys\\_filt\\_med.mat](#)
- [vgridpoints.csv](#)

The copyright of individual parts of the supplement might differ from the CC BY 4.0 License.
